# Supplementary material
Source: publisher site journal article supplement (https://www.dovepress.com/get_supplementary_file.php?f=452462.docx)

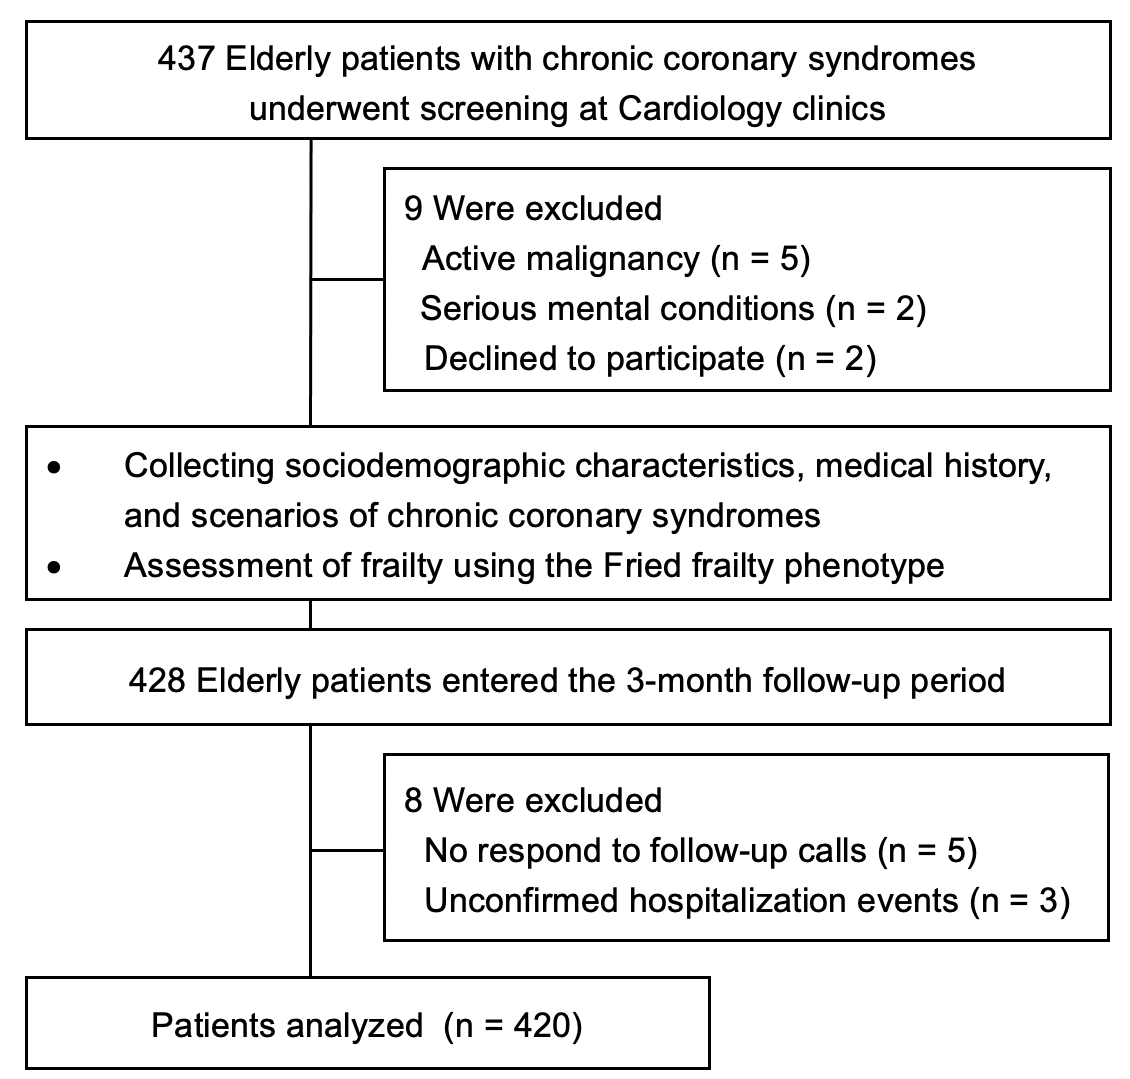


**Supplementary Figure S1.** The flow diagram of the study participants.

Supplement: Supplementary file 1 [file get_supplementary_file.php]
